# Supplementary material
Source: MDPI journal article supplement (https://www.mdpi.com/2072-4292/13/15/2985)
Supplement: s1 [file s1 › remotesensing-1287968-supplementary.pdf]

## Article

# Towards Sustainable Management of Mussel Farming through High-Resolution Images and Open Source Software—The Taranto Case Study

Carmine Massarelli <sup>1,\*</sup>, Ciro Galeone <sup>2</sup>, Ilaria Savino <sup>1</sup>, Claudia Campanale <sup>1</sup> and Vito Felice Uricchio <sup>1</sup>

<sup>1</sup> Water Research Institute—Italian National Research Council (CNR-IRSA), Via F. De Blasio 5 Zona Industriale, 70132 Bari, Italy; ilaria.savino@ba.irs.cnr.it (I.S.); claudia.campanale@ba.irs.cnr.it (C.C.); vito.uricchio@ba.irs.cnr.it (V.F.U.)

<sup>2</sup> Environmental Protection Agency of Apulia (ARPA Puglia), Corso Trieste 27, 70126 Bari, Italy; c.galeone@arpa.puglia.it

\* Correspondence: carmine.massarelli@ba.irs.cnr.it

## Supplementary Materials

In general, data acquired from high-altitude systems offer a broader spatial coverage but a low-resolution image. Nevertheless, some satellites sensors can provide high-resolution images at the expense of a higher price, whereas an airborne sensor may furnish high-resolution spatial images. Moreover, aeroplanes benefit from more flexible use since they may be used to examine small geographical areas. The only issue is that they must fly in favourable weather conditions because turbulence may cause the instability of the aircraft. Airborne sensors acquire images with a temporal resolution in the order of minutes, differently from satellites that orbit around the Earth at regular intervals of days or hours, such as the Sentinel 2A and 2B that provides images every five days [1–3], making their use inappropriate for investigations in near-real-time [1,4].

**Table S1.** Advantages and disadvantages between aircraft and satellite platforms.

| Platform  | Advantages                                                                                                                                                  | Disadvantages                                                                                                                   | References |
|-----------|-------------------------------------------------------------------------------------------------------------------------------------------------------------|---------------------------------------------------------------------------------------------------------------------------------|------------|
| Aircraft  | Relatively high spatial resolution                                                                                                                          |                                                                                                                                 |            |
|           | High spectral resolution                                                                                                                                    |                                                                                                                                 |            |
| Aircraft  | Changeable sensors                                                                                                                                          |                                                                                                                                 |            |
|           | They are highly flexible in terms of their configuration (spatial resolution, spectral range, number of bands, bandwidth, etc.) and the time of the survey. | High operating costs<br>Planning for aerial surveys, taking into account factors such as air traffic, solar conditions, weather |            |
| Aircraft  | Coverage of smaller geographic areas due to lower image acquisition altitude                                                                                | Image processing is complex<br>Low stability due to turbulence                                                                  |            |
|           | Temporal resolution: minutes                                                                                                                                |                                                                                                                                 |            |
| Satellite | High stability.                                                                                                                                             | High cost for high spatial resolution images.                                                                                   |            |
|           | Good historical data                                                                                                                                        | Low spectral resolution                                                                                                         |            |
| Satellite | Image processing is relatively easy                                                                                                                         | Atmospheric attenuation                                                                                                         |            |
|           |                                                                                                                                                             |                                                                                                                                 |            |

Low-cost for low-resolution images

Temporal resolution: hours and days

Adverse climatic conditions (e.g., clouds) or temporal changes can influence the interpretation of findings. May need to sort through many images to obtain helpful information.

There is significant limitation when eliminating cloud cover is problematic.

All of these applications produce georeferenced raster images containing various spectral bands defined by their wavelength and bandwidth. In general, the sensors record electromagnetic waves in the visible (VIS) (430–720 nm), medium (MIR) (1580–1750 nm) and near-infrared (NIR) (750–950 nm) light ranges. For example, various satellite and airborne sensors are used in evaluating the quality parameters of surface water, such as the analysis of chlorophyll, dissolved oxygen (DO), sea surface salinity, sea surface temperature, turbidity [5–11] and for monitoring the forms of pollution of water (plastic pollution, oil spill) [12–14] and soil [15], by measuring the amount of radiation at various wavelengths reflected from the surface of the water. However, the coverage of the electromagnetic spectrum of spaceborne sensors is limited in blue and middle infrared, as well as the thermal bands are not covered at the point that this may affect the accuracy of the estimation of water quality parameters [3]. Tables 2 and 3 show some satellite and airborne sensors and their configurations [3,5,10,16].

**Table S2.** Some sensor satellites and their configurations.

| Satellite sensor                              | Number of bands                                                  | Spectral range (nm)                    | Spatial resolution (m) | Swath width (km) | Temporal Resolution (days) | References |
|-----------------------------------------------|------------------------------------------------------------------|----------------------------------------|------------------------|------------------|----------------------------|------------|
| <b>Sentinel-2 Multi-Spectral Imager (MSI)</b> | 13 spectral bands, including 3 bands for atmospheric corrections | 443 – 2190                             | 10<br>20<br>60         | 290              | 5                          | [17]       |
| <b>NOAA WorldView-3</b>                       | 8 MS in VNIR<br>1 Pan<br>8 MS in SWIR                            | 400–1040,<br>450–800,<br>1195–2365     | 1.24<br>3.7<br>0.31    | 13.1             | 1– 4.5                     | [18]       |
| <b>Landsat 8 OLI/TIRS</b>                     | 9 OLI including 1 Pan<br>2 TIRS                                  | 433–2190,<br>500–680,<br>10.600–12.510 | 30<br>15<br>100        | 185              | 16                         | [19]       |
| <b>Sentinel-3 OLCI</b>                        | 21                                                               | 400–1020                               | 300                    | 1200             | 4                          | [20]       |
| <b>Terra MODIS</b>                            | 2<br>5<br>29                                                     | 620–876,<br>459–2155, 405–<br>877      | 250<br>500<br>1000     | 2330             | 2                          | [21]       |

Table S3. Some typical airborne hyperspectral imaging systems.

| Airborne sensor                                                | Number of bands          | Spatial resolution (m) | Spectral range (nm) | FOV (deg) | IFOV (mrad) | Imaging swath                     | References |
|----------------------------------------------------------------|--------------------------|------------------------|---------------------|-----------|-------------|-----------------------------------|------------|
| <b>Compact Airborne Spectrographic Imager (CASI)</b>           | Up to 288                | 0.5–3                  | 400–2500            | 40        | 0.49/0.698  | 512 pixels per scanline           | [16,22]    |
| <b>Airborne Visible Infrared Imaging Spectrometer (AVIRIS)</b> | 224                      | 17                     | 400–2500            | 30        | 1           | 12 km and 614 pixels per scanline | [23]       |
| <b>Airborne Prism Experiment (APEX)</b>                        | Up to 334 VNIR -199 SWIR | 2–5                    | 380–970, 940–2500   | 28°       | 0.48        | 2.5–5 km                          | [24]       |
| <b>HyMap</b>                                                   | 128                      | 3–10                   | 400–2500            | 60        | 2×2.5       | 512 pixels                        | [25]       |
| <b>AISA - Airborne Imaging Spectrometer</b>                    | 286                      | 1                      | 450 - 900           | 21        | 1           | 384 pixels per scanline           | [26]       |

## Reference

- Mastelic, T.; Lorincz, J.; Ivandic, I.; Boban, M. Aerial Imagery Based on Commercial Flights as Remote Sensing Platform. *Sensors* 2020, 20, doi:10.3390/s20061658.
- Li, J.; Roy, P.D. A Global Analysis of Sentinel-2A, Sentinel-2B and Landsat-8 Data Revisit Intervals and Implications for Terrestrial Monitoring. *Remote Sens.* 2017, 9, doi:10.3390/rs9090902.
- Haji Gholizadeh, M.; Melesse, A.M.; Reddi, L. Spaceborne and airborne sensors in water quality assessment. *Int. J. Remote Sens.* 2016, 37, 3143–3180, doi:10.1080/01431161.2016.1190477.
- Turk, J.; Hawkins, J.D.; Azuza, N.G.; Mugnai, A. Combining Ssm/I, Trmm And Infrared Geostationary Satellite Data In A Near-Realtime Fashion For Rapid Precipitation Updates: Advantages And Limitations; 2000;
- Chawla, I.; Karthikeyan, L.; Mishra, A.K. A review of remote sensing applications for water security: Quantity, quality, and extremes. *J. Hydrol.* 2020, 585, doi:10.1016/j.jhydrol.2020.124826.
- Kim, Y.H.; Son, S.; Kim, H.-C.; Kim, B.; Park, Y.-G.; Nam, J.; Ryu, J. Application of satellite remote sensing in monitoring dissolved oxygen variabilities: A case study for coastal waters in Korea. *Environ. Int.* 2020, 134, doi:10.1016/j.envint.2019.105301.
- Melet, A.; Teatini, P.; Le Cozannet, G.; Jamet, C.; Conversi, A.; Benveniste, J.; Almar, R. Earth Observations for Monitoring Marine Coastal Hazards and Their Drivers. *Surv. Geophys.* 2020, 41, doi:10.1007/s10712-020-09594-5.
- Dinnat, E.; Le Vine, D.; Boutin, J.; Meissner, T.; Lagerloef, G. Remote Sensing of Sea Surface Salinity: Comparison of Satellite and In Situ Observations and Impact of Retrieval Parameters. *Remote Sens.* 2019, 11, doi:10.3390/rs11070750.
- Attila, J.; Kauppila, P.; Kallio, K.Y.; Alasalmi, H.; Keto, V.; Bruun, E.; Koponen, S. Applicability of Earth Observation chlorophyll-a data in assessment of water status via MERIS — With implications for the use of OLCI sensors. *Remote Sens. Environ.* 2018, 212, doi:10.1016/j.rse.2018.02.043.
- Gholizadeh, M.H.; Melesse, A.M.; Reddi, L. A comprehensive review on water quality parameters estimation using remote sensing techniques. *Sensors* 2016, 16, doi:10.3390/s16081298.
- Richter, K.; Maas, H.-G.; Westfeld, P.; Weiß, R. An Approach to Determining Turbidity and Correcting for Signal Attenuation in Airborne Lidar Bathymetry. *PFG – J. Photogramm. Remote Sens. Geoinf. Sci.* 2017, 85, doi:10.1007/s41064-016-0001-0.
- Viatte, C.; Clerbaux, C.; Maes, C.; Daniel, P.; Garelllo, R.; Safieddine, S.; Arduin, F. Air Pollution and Sea Pollution Seen from Space. *Surv. Geophys.* 2020, 41, doi:10.1007/s10712-020-09599-0.
- Martínez-Vicente, V.; Clark, J.R.; Corradi, P.; Aliani, S.; Arias, M.; Bochow, M.; Bonnery, G.; Cole, M.; Cózar, A.; Donnelly, R.; et al. Measuring Marine Plastic Debris from Space: Initial Assessment of Observation Requirements. *Remote Sens.* 2019, 11, doi:10.3390/rs11202443.
- Fingas, M.; Brown, C. A Review of Oil Spill Remote Sensing. *Sensors* 2017, 18, doi:10.3390/s18010091.

15. Massarelli, C. Fast detection of significantly transformed areas due to illegal waste burial with a procedure applicable to Landsat images. *Int. J. Remote Sens.* 2018, 39, 754–769.
16. Zhang, D.; Yuan, L.; Wang, S.; Yu, H.; Zhang, C.; He, D.; Han, G.; Wang, J.; Wang, Y. Wide Swath and High Resolution Airborne HyperSpectral Imaging System and Flight Validation. *Sensors* 2019, 19, doi:10.3390/s19071667.
17. <https://sentinel.esa.int/web/sentinel/technical-guides/sentinel-2-msi>.
18. <https://directory.eoportal.org/web/eoportal/satellite-missions/v-w-x-y-z/worldview-3>.
19. [https://www.usgs.gov/core-science-systems/nli/landsat/landsat-8?qt-science\\_support\\_page\\_related\\_con=0#qt-science\\_support\\_page\\_related\\_con](https://www.usgs.gov/core-science-systems/nli/landsat/landsat-8?qt-science_support_page_related_con=0#qt-science_support_page_related_con).
20. <https://sentinel.esa.int/web/sentinel/technical-guides/sentinel-3-olci>.
21. <https://modis.gsfc.nasa.gov/about/specifications.php>.
22. Babey, S.K.; Anger, C.D. Compact airborne spectrographic imager (CASI): a progress review.; Vane, G., Ed.; 1993.
23. <https://directory.eoportal.org/web/eoportal/airborne-sensors/aviris>.
24. <https://eoportal.org/web/eoportal/airborne-sensors/content/-/article/apex>.
25. Cocks, T.; Jenssen, R.; Stewart, A.; Wilson, I.; Shields, T. THE HYMAP TM AIRBORNE HYPERSPECTRAL SENSOR: THE SYSTEM, CALIBRATION AND PERFORMANCE; 1998; Vol. 33;.
26. Makisara, K.; Meinander, M.; Rantasuo, M.; Okkonen, J.; Aikio, M.; Sipola, K. Airborne imaging spectrometer for applications (AISA). In Proceedings of the Proceedings of IGARSS '93 - IEEE International Geoscience and Remote Sensing Symposium; IEEE, 1993.
